# Supplementary material for: Comparative genomics and the nature of placozoan species
Source: PLoS Biol. 2018 Jul 31;16(7):e2005359. doi: 10.1371/journal.pbio.2005359 (PMC6067683; doi:10.1371/journal.pbio.2005359)
Supplement: S5 Table — Collinearity between the 10 largest Trichoplax adhaerens (labeled “T.a.”) scaffolds and the associated 144 Hoilungia hongkongensis (labeled “H.h.”) supercontigs >100 Kb. (XLSX) [file pbio.2005359.s026.xlsx]

## Sheet: S5 Table
T.a. scaffold ID	scaffold size [Mbp]	gene number in T.a. scaffold	collinear H.h. genes	percentage of collinear genes
ta1	13.2	1581	1199	75.8
ta2	9.7	1168	887	75.9
ta3	9.6	1109	812	73.2
ta4	8.6	1027	789	76.8
ta5	8.2	955	664	69.5
ta6	5.9	757	592	78.2
ta7	5.8	669	527	78.8
ta8	3.4	342	205	59.9
ta9	3.2	373	278	74.5
ta10	2.4	279	206	73.8
total	70	8260	6159	73.6 (±5.5)
