# Supplementary material for: Comparative genomics and the nature of placozoan species
Source: PLoS Biol. 2018 Jul 31;16(7):e2005359. doi: 10.1371/journal.pbio.2005359 (PMC6067683; doi:10.1371/journal.pbio.2005359)
Supplement: S6 Table — Shown are all isolates, including their origin. The provided isolate ID was used in Fig 3 in addition to the haplotype. AS, aquarium sample. (XLSX) [file pbio.2005359.s027.xlsx]

## Sheet: S6 Table
clade	species/haplotype	isolate ID	origin	Ocean	reference
I	T. adhaerens (H1)	P1	Israel	Red Sea	[1]
I	T. adhaerens (H1)	P2	Mallorca, Spain	Mediterranean	[2]
I	H2	P5	Panama	Caribbean	[3]
I	H2	P6	Tenerife, Spain	Atlantic Ocean	[2]
I	H2	P7	Indonesia (AS)	Indo-Pacific	[3]
I	H2	P8	Tunesia	Mediterranean	[2]
I	H2	P9	Réunion	Indian Ocean	[2]
I	H2	P10	Okinawa	Pacific Ocean	[2]
I	H2	P45	N France	Atlantic Ocean	[4]
I	H2	P50	Hong Kong	Pacific Ocean	[4]
III	H7	P21	AS	unknown	[3]
III	H7	P22	AS	unknown	[3]
III	H8	P23	Guam	Pacific Ocean	[3]
III	H8	P24	Bahamas	Caribbean	[2]
III	H8	P25	Hawaii	Pacific Ocean	[2]
III	H16	P41	Kenya	Indian Ocean	[2]
III	H16	P42	Kenya	Indian Ocean	[2]
IV	H5	P18	Italy	Mediterranean	[3]
IV	H5	P19	Italy	Mediterranean	[3]
V	H. hongkongensis (H13)	HH	Hong Kong	Pacific Ocean	this study
V	H. hongkongensis (H13)	P35	Hong Kong	Pacific Ocean	[2]
V	H. hongkongensis (H13)	P44	Hong Kong	Pacific Ocean	[2]
V	H10	P30	Italy	Mediterranean	[2]
V	H15	P39	Philippines	Indo-Pacific	[2]
V	H15	P40	Philippines	Indo-Pacific	[2]
V	H4	P13	Malaysia	Indo-Pacific	[2]
V	H4	P14	Hong Kong	Pacific Ocean	[2]
V	H4	P16	Panama	Pacific Ocean	[3]
V	H4	P17	Thailand	Indo-Pacific	[2]
V	H4	P46	Costa Rica	Pacific Ocean	[4]
V	H4	P52	Bali	Indo-Pacific	[4]
V	H9	P26	Turkey	Mediterranean	[2]
V	H9	P28	Lizard Island	Pacific Ocean	[5]
VII	H12	P32	Indonesia (AS)	Indo-Pacific	[2]
VII	H12	P33	Indonesia (AS)	Indo-Pacific	[2]
VII	H18	P48	Brazil	Atlantic Ocean	[4]
