# Supplementary material for: Comparative genomics and the nature of placozoan species
Source: PLoS Biol. 2018 Jul 31;16(7):e2005359. doi: 10.1371/journal.pbio.2005359 (PMC6067683; doi:10.1371/journal.pbio.2005359)
Supplement: S9 Table — Summary of protein datasets used for distance calculations (dataset 1) and phylogenetic inferences (dataset 2). Matrix length is 37,838 amino acid characters (dataset 1) and 35,799 (dataset 2), respectively. (XLSX) [file pbio.2005359.s030.xlsx]

## Sheet: S9 Table
data-set #	used for	description	genes	total taxa	outgroup taxa	non-bilaterian taxa	% missing characters
1	distance calculations	full dataset	212	378	0	176	24.1
2	phylogenetic inferences	maximum gene content in outgroup taxa; overall gene coverage >50%	194	58	2	32	10.8
