# Supplementary material for: Comparative genomics and the nature of placozoan species
Source: PLoS Biol. 2018 Jul 31;16(7):e2005359. doi: 10.1371/journal.pbio.2005359 (PMC6067683; doi:10.1371/journal.pbio.2005359)
Supplement: S11 Table — (XLSX) [file pbio.2005359.s032.xlsx]

## Sheet: S11 Table
phylum	class	species	accession
PORIFERA	Calcarea	Leucosolenia complicata	KT997975.1, KT997966.1
	Calcarea	Sycon ciliatum	KU244276.1, KU244278.1
	Demospongiae	Amphimedon queenslandica	NC_008944.1
	Demospongiae	Chondrilla nucula	NC_010208
	Demospongiae	Crella elegans	NC_027520.1
	Demospongiae	Ephydatia muelleri	NC_010202.1
	Demospongiae	Halisarca dujardini	NC_010212.1
	Demospongiae	Petrosia ficiformis	NC_027519.1
	Demospongiae	Spongilla lacustris	LT158503.1, KU759841.1
	Hexactinellida	Aphrocallistes vastus	NC_010769.1
	Hexactinellida	Sympagella nux	EF537577.1
	Homoscleromorpha	Corticium candelabrum	NC_014872.1
	Homoscleromorpha	Oscarella carmela	NC_009090.1
CNIDARIA	Anthozoa	Acropora digitifera	NC_022830.1
	Anthozoa	Nematostella vectensis	NC_008164.1
	Anthozoa	Pocillopora damicornis	NC_009797.1
	Anthozoa	Seriatopora hystrix	NC_010244.1
	Anthozoa	Stylophora pistillata	NC_011162.1
	Hydrozoa	Craspedacusta sowerbyi	NC_018537.1
	Hydrozoa	Hydra vulgaris	NC_011221.1
	Hydrozoa	Hydractinia symbiolongicarpus	LN901197.1
	Hydrozoa	Physalia physalis	KT809328.1
	Scyphozoa	Aurelia aurita	NC_008446.1
	Scyphozoa	Cyanea capillata	JN700937.1
CTENOPHORA	Tentaculata	Mnemiopsis leidyi	NC_016117.1
	Tentaculata	Pleurobrachia bachei	NC_016697.1
PLACOZOA	-	Trichoplax adhaerens	NC_008151.2
	-	Placozoa sp. H4	NC_008833.2
	-	Placozoa sp. H8	NC_008832.2
